# Supplementary material
Source: PubMed Central journal article supplement (PMC8005286)
Supplement: NIHMS1677023-supplement-1.pdf [file NIHMS1677023-supplement-1.pdf]

| Antigen                                          | Application          | Host   | Dilution | Catalog #  | Source         |
|--------------------------------------------------|----------------------|--------|----------|------------|----------------|
| <b>Primary Antibodies</b>                        |                      |        |          |            |                |
| Myelin basic protein (MBP)                       | Immunofluorescence   | rat    | 1:250    | MAB386     | Millipore      |
| Neurofilament                                    | Immunofluorescence   | mouse  | 1:250    | 837904     | BioLegend      |
| A $\beta$ peptide 6F3D                           | Immunohistochemistry | mouse  | 1:400    | M0872      | Dako           |
| Collagen IV (Col IV)                             | Immunofluorescence   | rabbit | 1:200    | ab6586     | Abcam          |
| Collagen IV (Col IV)                             | Immunofluorescence   | mouse  | 1:300    | SAB4200500 | Sigma          |
| Elastin                                          | Immunofluorescence   | rabbit | 1:150    | AB2039     | Millipore      |
| Laminin                                          | Immunofluorescence   | rabbit | 1:500    | ab11575    | Abcam          |
| $\alpha$ -Smooth muscle actin                    | Immunofluorescence   | rabbit | 1:500    | ab5694     | Abcam          |
| Amyloid precursor protein, C-terminal            | Immunoblot           | rabbit | 1:2000   | 171610     | Sigma          |
| $\beta$ -secretase (BACE)                        | Immunoblot           | rabbit | 1:2000   | 5606       | Cell Signaling |
| Nephrilysin (NEP)                                | Immunoblot           | rabbit | 1:1000   | ab256494   | Abcam          |
| Cathepsin B (CatB)                               | Immunoblot           | rabbit | 1:2000   | 31718      | Cell Signaling |
| Osteopontin (OPN)                                | Immunoblot           | rabbit | 1:500    | ab8448     | Abcam          |
| Rho-associated protein kinase 1 (ROCK1)          | Immunoblot           | rabbit | 1:1000   | ab134181   | Abcam          |
| Rho-associated protein kinase 2 (ROCK2)          | Immunoblot           | rabbit | 1:2000   | ab125025   | Abcam          |
| Glyceraldehyde 3-phosphate dehydrogenase (GAPDH) | Immunoblot           | rabbit | 1:50000  | G9545      | Sigma          |
| <b>Secondary Antibodies</b>                      |                      |        |          |            |                |
| Rat IgG Alexa 488                                | Immunofluorescence   | donkey | 1:200    | A21208     | Thermo-Fisher  |
| Mouse IgG Alexa 594                              | Immunofluorescence   | goat   | 1:200    | A11032     | Thermo-Fisher  |
| Mouse IgG from VECTASTAIN ABC HRP Kit            | Immunohistochemistry | horse  | 1:400    | PK-4002    | Vector Labs    |
| Rabbit IgG Alexa 488                             | Immunofluorescence   | goat   | 1:200    | A11008     | Thermo-Fisher  |
| Rabbit IgG horseradish peroxidase                | Immunoblot           | goat   | 1:2000   | 7074       | Cell Signaling |

**Supplementary Table S1.** List of antibodies used in the current study.
